# Supplementary material for: Identifying heart failure in patients with chronic obstructive lung disease through the Canadian Primary Care Sentinel Surveillance Network in British Columbia: a case derivation study
Source: PubMed Central journal article supplement — CMAJ Open. 2021 Apr 16;9(2):E376–83. doi: 10.9778/cmajo.20200183 (PMC8084551; doi:10.9778/cmajo.20200183), 2021-04-16
Supplement: supp_9.2.E376_2020-0183-3-at.pdf [file supp_9.2.E376_2020-0183-3-at.pdf]

Appendix 3. Diagnosis codes table

| ICD-9 Code |                                                                |
|------------|----------------------------------------------------------------|
| 428        | Heart failure                                                  |
| 428        | Congestive heart failure, unspecified                          |
| 428.1      | Left heart failure convert                                     |
| 428.2      | Systolic heart failure                                         |
| 428.2      | Systolic heart failure, unspecified                            |
| 428.21     | Acute systolic heart failure                                   |
| 428.22     | Chronic systolic heart failure                                 |
| 428.23     | Acute on chronic systolic heart failure                        |
| 428.3      | Diastolic heart failure                                        |
| 428.3      | Diastolic heart failure, unspecified                           |
| 428.31     | Acute diastolic heart failure                                  |
| 428.32     | Chronic diastolic heart failure                                |
| 428.33     | Acute on chronic diastolic heart failure                       |
| 428.4      | Combined systolic and diastolic heart failure                  |
| 428.4      | Combined systolic and diastolic heart failure, unspecified     |
| 428.41     | Acute combined systolic and diastolic heart failure            |
| 428.42     | Chronic combined systolic and diastolic heart failure          |
| 428.43     | Acute on chronic combined systolic and diastolic heart failure |
| 428.9      | Heart failure, unspecified                                     |
| 425        | Cardiomyopathy                                                 |
| 425.0      | Endomyocardial fibrosis                                        |
| 425.1      | Hypertrophic cardiomyopathy                                    |
| 425.11     | Hypertrophic obstructive                                       |
| 425.18     | Other hypertrophic cardiomyopathy                              |
| 425.2      | Obscure cardiomyopathy                                         |
| 425.3      | Endocardial fibroelastosis                                     |
| 425.4      | Other primary cardiomyopathies                                 |
| 425.5      | Alcoholic cardiomyopathy                                       |
| 425.7      | Nutritional and metabolic cardiomyopathy                       |
| 425.8      | Cardiomyopathy in other diseases classified elsewhere          |
| 425.9      | Secondary cardiomyopathy, unspecified                          |
