# Supplementary material for: Identifying heart failure in patients with chronic obstructive lung disease through the Canadian Primary Care Sentinel Surveillance Network in British Columbia: a case derivation study
Source: PubMed Central journal article supplement — CMAJ Open. 2021 Apr 16;9(2):E376–83. doi: 10.9778/cmajo.20200183 (PMC8084551; doi:10.9778/cmajo.20200183), 2021-04-16
Supplement: supp_9.2.E376_2020-0183-5-at.pdf [file supp_9.2.E376_2020-0183-5-at.pdf]

## Appendix 5. Diagnosis codes table

|                                       |                                                                           |
|---------------------------------------|---------------------------------------------------------------------------|
| ICD-9 Codes                           |                                                                           |
| 428; any or no decimals is acceptable | Heart failure                                                             |
| 425 (no decimals)                     | Cardiomyopathy                                                            |
| 425.4                                 | Other primary cardiomyopathies                                            |
| 425.5                                 | Alcoholic cardiomyopathy                                                  |
| 425.7                                 | Nutritional and metabolic cardiomyopathy                                  |
| 425.8                                 | Cardiomyopathy in other diseases classified elsewhere                     |
| 425.9                                 | Secondary cardiomyopathy, unspecified                                     |
| 402.x1*                               | Hypertensive heart disease with cardiovascular disease with heart failure |
| 404.x1, 404.x3*                       | Hypertensive heart disease with cardiorenal with heart failure            |

\* x indicates any number in that position.

\*\*Changes from Appendix 1 included removing 425.0-425.3 (425.0 Endomyocardial fibrosis, 425.1 Hypertrophic cardiomyopathy, 425.2 Obscure cardiomyopathy and 425.3 Endocardial fibroelastosis) and addition of 402.X1, 404.X1 and 404.X3
