# Supplementary material for: Identifying heart failure in patients with chronic obstructive lung disease through the Canadian Primary Care Sentinel Surveillance Network in British Columbia: a case derivation study
Source: PubMed Central journal article supplement — CMAJ Open. 2021 Apr 16;9(2):E376–83. doi: 10.9778/cmajo.20200183 (PMC8084551; doi:10.9778/cmajo.20200183), 2021-04-16
Supplement: supp_9.2.E376_2020-0183-6-at.pdf [file supp_9.2.E376_2020-0183-6-at.pdf]

Appendix 6. Accuracy Parameters from Sensitivity Test of Case Definitions in BC CPCSSN

| Definition                                                                                         | Sensitivity (95% CI) | Specificity (95% CI) | PPV (95% CI)      | NPV (95% CI)      |
|----------------------------------------------------------------------------------------------------|----------------------|----------------------|-------------------|-------------------|
| 1.1 MaRNet-FP<br>1 ICD9 code OR<br>ACEI/ARB+BB+diuretic                                            | 93.1 (84.5, 97.7)    | 93.3 (89.4, 96.1)    | 80.7 (70.6, 88.6) | 97.8 (95.0, 99.3) |
| 1.2 MaRNet-FP<br>Including billings                                                                | 94.4 (86.4, 98.5)    | 90.8 (86.4, 94.1)    | 75.6 (65.4, 84.0) | 98.2 (95.4, 99.5) |
| <b>Expanding codes and testing iterations and specific combinations (British Columbia group 1)</b> |                      |                      |                   |                   |
| 2.1 One expanded code<br>AND specific medication                                                   | 76.4 (64.9, 85.6)    | 92.9 (88.9, 95.8)    | 76.4 (64.9, 85.6) | 92.9 (88.9, 95.8) |
| 2.2 One expanded code<br>only                                                                      | 93.1 (84.5, 97.7)    | 91.2 (86.9, 94.5)    | 76.1 (65.9, 84.6) | 97.8 (94.8, 99.3) |
| 2.3 Two expanded codes                                                                             | 83.3 (72.7, 91.1)    | 94.6 (90.9, 97.1)    | 82.2 (71.5, 90.2) | 95.0 (91.4, 97.4) |
| 2.4 Specific medication<br>only                                                                    | 18.1 (10.0, 28.9)    | 99.6 (97.7, 100.0)   | 92.9 (66.1, 99.8) | 80.1 (75.1, 84.5) |
| 2.5 (2.1 or 2.3 or 2.4)                                                                            | 88.9 (79.3, 95.1)    | 92.1 (87.9, 95.1)    | 77.1 (66.6, 85.6) | 96.5 (93.2, 98.5) |
| <b>Furosemide (British Columbia group 2)</b>                                                       |                      |                      |                   |                   |
| 3.1 (2.1 OR Furosemide)                                                                            | 83.3 (72.7, 91.1)    | 94.1 (90.4, 96.8)    | 81.1 (70.3, 89.3) | 94.9 (91.3, 97.4) |
| 3.2 (3.1 including billing)                                                                        | 91.7 (82.7, 96.9)    | 91.6 (87.4, 94.8)    | 76.7 (66.4, 85.2) | 97.3 (94.3, 99.0) |
| <b>Including low threshold natriuretic peptide</b>                                                 |                      |                      |                   |                   |
| 4.1 (1.1 or low NP)                                                                                | 94.4 (86.4, 98.5)    | 88.7 (84.0, 92.4)    | 71.6 (61.4, 80.4) | 98.1 (95.3, 99.5) |
| 4.2 (1.2 or low NP)                                                                                | 95.8 (88.3, 99.1)    | 87.0 (82.1, 91.0)    | 69.0 (59.0, 77.9) | 98.6 (95.9, 99.7) |
| 4.3 (3.2 or low NP)                                                                                | 94.4 (86.4, 98.5)    | 87.0 (82.1, 91.0)    | 68.7 (58.6, 77.6) | 98.1 (95.2, 99.5) |
| <b>Including high threshold NP (High NP)</b>                                                       |                      |                      |                   |                   |
| 5.1 (1.1 or high NP)                                                                               | 93.1 (84.5, 97.7)    | 92.9 (88.9, 95.8)    | 79.8 (69.6, 87.7) | 97.8 (94.9, 99.3) |
| 5.2 (1.2 or high NP)                                                                               | 94.4 (86.4, 98.5)    | 90.8 (86.4, 94.1)    | 75.6 (65.4, 84.0) | 98.2 (95.4, 99.5) |
| 5.3 (3.2 or high NP)                                                                               | 91.7 (82.7, 96.9)    | 91.6 (87.4, 94.8)    | 76.7 (66.4, 85.2) | 97.3 (94.3, 99.0) |

PPV: Positive Predictive Value; NPV: Negative Predictive Value; 95% CI: 95% Confidence Interval; NS: Nova Scotia Definition; NP: natriuretic peptide; exp: expanded ICD-9 codes (see Appendix 3); Rx: medications (see Appendix 3)
