# Supplementary material for: Identifying heart failure in patients with chronic obstructive lung disease through the Canadian Primary Care Sentinel Surveillance Network in British Columbia: a case derivation study
Source: PubMed Central journal article supplement — CMAJ Open. 2021 Apr 16;9(2):E376–83. doi: 10.9778/cmajo.20200183 (PMC8084551; doi:10.9778/cmajo.20200183), 2021-04-16
Supplement: supp_9.2.E376_2020-0183-original-submission.pdf [file supp_9.2.E376_2020-0183-original-submission.pdf]

1  
2  
3 Title: Identifying Heart Failure in patients with Chronic Obstructive Lung Disease through the  
4 Canadian Primary Care Sentinel Surveillance Network in British Columbia: A Case Validation  
5 Study  
6  
7  
8  
9

10 Study Type: Case Validation Study (Diagnostic Accuracy)  
11  
12  
13

14 Rohit Vijh BSc MD<sup>1,2</sup>, Sabrina T. Wong, RN, PhD<sup>4,5</sup>, Matthew Grandy BSc, MD<sup>6,7</sup>, Sandra  
15 Peterson MSc<sup>4</sup>, Allison M. Ezzat PT, PhD<sup>4,5</sup>, Andrew Gibb PhD<sup>4</sup>, Nathaniel M Hawkins MD MPH<sup>3</sup>  
16  
17

- 18 1. School of Population and Public Health, University of British Columbia
- 19 2. Public Health and Preventative Medicine Residency, Postgraduate Medical Education,  
20 University of British Columbia
- 21 3. Division of Cardiology, University of British Columbia, Vancouver, Canada
- 22 4. Centre for Health Services and Policy Research, University of British Columbia
- 23 5. School of Nursing, University of British Columbia
- 24 6. Primary Care Research Unit, Dalhousie Department of Family Medicine, Halifax, Nova Scotia
- 25 7. Family Medicine, Dalhousie University, Halifax, Nova Scotia
- 26  
27  
28  
29  
30  
31  
32  
33

34 Correspondence to:  
35

36 Sabrina T. Wong, RN, PhD. Professor and Co-Chair  
37

38 University of British Columbia Centre for Health Services and Policy Research and School of  
39 Nursing; Canadian Primary Care Sentinel Surveillance Network  
40

41 2211 Wesbrook Mall, Vancouver, BC V6T-2B5  
42

43 Sabrina.wong@ubc.ca  
44  
45  
46

47 Word Count: 2488/2500  
48  
49  
50  
51  
52  
53  
54  
55  
56  
57  
58  
59  
60

## Abstract

**Background:** Heart failure (HF) poses a significant global health burden. Appropriate surveillance is critical to ensure health promotion and healthcare programming is effectively targeting populations. Case definitions for HF have predominantly centered around hospitalizations and physician billings data. The Canadian Primary Care Surveillance Sentinel Network (CPCSSN) offers the ability to identify HF from primary care electronic medical records. We validated a case definition for HF among a retrospective cohort of patients with Chronic Obstructive Pulmonary Disease (COPD) in British Columbia.

**Methods:** HF case definitions were developed by combining diagnostic codes, medication and laboratory values from primary care electronic medical records. These were compared to HF diagnoses identified through detailed chart review as the gold standard. Sensitivity, specificity, negative (NPV) and positive predictive values (PPV) were calculated for each definition.

**Results:** Charts of 311 patients with COPD were reviewed, of whom 72 (23.2%) had HF. Five categories of definitions were constructed, all of which had excellent sensitivity, specificity and NPV. PPV performed moderately well. The optimal case definition consisted of 1 HF billing code or a specific combination of medications for HF. This definition had an excellent specificity (93.3% [95% CI: 89.4-96.1]), sensitivity (90.2% [95% CI: 80.9-96.0]), PPV (80.3% [95% CI: 69.9-88.3]) and NPV (96.9% [95% CI: 93.8-98.8]).

**Interpretation:** A case definition for HF was validated and can be utilized in CPCSSN to accurately identify HF in patients with COPD in primary care.

## Background

Heart Failure (HF) is a global public health problem affecting 40 million individuals worldwide (1) with healthcare costs exceeding \$100 billion (2). Chronic Obstructive Pulmonary Disease (COPD) is highly prevalent in individuals with HF (20-30% of HF patients have COPD)(3). To facilitate high quality management of HF in COPD, an accurate case definition is necessary. Despite many patients with HF being largely managed in primary care without specialist contact,(4) studies examining the accuracy of HF diagnosis and coding have been predominantly hospital based(5)(6)(7). A systematic review of validated case definitions for HF found that hospital discharge data were used in 25 out of 35 studies, with all studies utilizing exclusively ICD9/10 codes(8). Additionally, physician billing services provides only limited data resulting in variable accuracy parameters (sensitivity, specificity, positive predictive value (PPV) and negative predictive value (NPV).)(8)(9). In Canada, HF failure is often identified through discharge abstract databases or physician billing data(10)(11). A significant gap exists in accurately understanding the prevalence and burden of HF across the entire health care system.

Identifying HF cases from primary care would be beneficial for several reasons. First, electronic medical records (EMR) provide prospective and systematic collection of clinically verified data regarding individual patient management. Second, the availability of additional clinical variables such as medication history and lab data have the potential to improve case validity. Lastly, EMRs will characterize community patients with HF that would not otherwise be captured from hospital sources. Only a handful of studies have evaluated a HF case definition utilizing primary care databases and comparing against a gold standard (ie. chart review) in an unselected generalizable population(11)(12)(13). Of these studies, two originated in the United States, while the remaining study compared administrative and billing data to primary care records in Ontario(12). No studies have examined a case definition of HF in a COPD population.

The objective of this study was to validate an EMR-based definition of HF in primary care in British Columbia (BC), Canada. Establishing a rigorous definition for HF will allow future epidemiological studies to examine HF across Canada. An accurate case definition will define the overall population burden of disease, characterize the contemporary medical management

1  
2  
3 in primary care, and create opportunities for quality improvement. The study was nested within  
4 a broader program of research examining HF in patients with COPD. These two conditions are  
5 common partners, each being associated with undertreatment and worse prognosis in the  
6 alternate condition(14).  
7  
8  
9

## 10 11 12 **Methods**

13  
14 *Study Design.* The study was a cross-sectional retrospective chart review of a cohort of patients  
15 from primary care practices in BC recruited through the BC Canadian Primary Care Sentinel  
16 Surveillance Network (CPCSSN).  
17  
18

19  
20  
21 *CPCSSN data.* Case definitions for multiple chronic diseases, including COPD, have been  
22 validated using the CPCSSN database (15). CPCSSN is a pan-Canadian 'network of networks'  
23 with over 1500 primary care providers, covering all provinces except Saskatchewan using 17  
24 different EMR systems(16). Point-of-care de-identified data are extracted semi-annually and  
25 transformed to a standard CPCSSN schema. The architecture and approach has been previously  
26 described, including data flow, quality, mapping, cleaning and de-identification (Appendix  
27 1)(16). As of December 2019, CPCSSN includes over 200 million records from almost 2 million  
28 patients. This project used BC CPCSSN data extracted on December 31, 2018 (2018-Q4). The  
29 data includes socio-demographics, providers, encounters, health conditions, risk factors,  
30 biometrics, laboratory results, procedures, medications and referral information(15).  
31  
32  
33  
34  
35  
36  
37  
38  
39  
40

41  
42 *Study Population.* Fourteen BC-CPCSSN physicians working in three general practices were  
43 invited to contribute patients with COPD for chart review to identify HF. Assuming a prevalence  
44 for HF of 20% in patients with COPD, a sample size of 311 patients with COPD was estimated to  
45 achieve a precision of 10% around accuracy parameters. Nine of the fourteen physicians  
46 consented to participate in the study. We used the EMR data extracted for CPCSSN for each  
47 consenting physician. For each physician patient panel, a random sample of their COPD patients  
48 was generated by AG. Individuals were excluded if they did not meet the CPCSSN COPD case  
49  
50  
51  
52  
53  
54  
55  
56  
57  
58  
59  
60

1  
2  
3 definition (which excludes individuals <35 years), if they did not have a valid BC Personal Health  
4 Number or if their provider did not consent to participate in the study.  
5  
6  
7

8  
9 *Sampling.* AG generated the initial sample of all BC patients in CPCSSN (n=102,867 patients)  
10 from the 2018-Q4 period. From this cohort, we selected individuals with COPD (>35 years,  
11 based on validated CPCSSN definition) from the participating 3 clinics and 9 physicians (n=625).  
12 From this cohort, random selection and review of 311 patient charts from each clinic was  
13 carried out (by RV) from September-November 2019(17)(Figure 1).  
14  
15  
16  
17  
18

19  
20 **Insert Figure 1 here**  
21

22  
23 *Chart Review and 'Gold standard'.*  
24

25 In British Columbia, "Gold" standard validation was conducted by a medical resident (RV) who  
26 verified presence or absence of HF for each patient by manually reviewing their entire EMR. A  
27 data abstraction tool was developed in Qualtrics (Qualtrics, Provo, UT) with input from a  
28 cardiologist and family physician, focused on variables required to establish a diagnosis of HF  
29 (Appendix 2). The chart review included clinic site visits to confirm further evidence of HF by  
30 reviewing unstructured data (e.g. echocardiogram reports, free text notes). The abstracted data  
31 was then reviewed by both the abstractor (RV) and cardiologist (NH), to determine  
32 classification of HF status. The presence of HF was defined by symptoms and/or signs of  
33 reduced cardiac output and/or pulmonary or systemic congestion, supported by objective  
34 evidence of structural and/or functional cardiac abnormality, including left ventricular systolic  
35 (defined by reduced left ventricular ejection fraction using any imaging modality), diastolic  
36 dysfunction (typically by echocardiography), elevated natriuretic peptides, or structural disease  
37 (such as severe valve disease)(18)(19).  
38  
39  
40  
41  
42  
43  
44  
45  
46  
47  
48  
49  
50  
51  
52  
53  
54  
55  
56  
57  
58  
59  
60

### Case Definition

An initial case definition was developed by the Maritime Family Practice Research Network (MaRNet-FP), based on ICD9/10 codes or prescribed combinations of medical therapies for HF (see Table 1 and Appendix 3). BC-CPCSSN examined this original definition, then proposed and tested amendments (Table 1). These modifications were developed for several reasons: based on additional data element locations within different EMR systems (e.g. billing versus encounter diagnoses), expanded ICD-9 codes (based on review of HF coding literature), addition of HF specific medications (e.g. sacubitril-valsartan, ivabradine), and laboratory data (BNP and pro-NT BNP)(Table 1). Two thresholds for natriuretic peptides were applied 1) the recommended low 'rule out' threshold (BNP > 50 or NT-proBNP > 125) and higher 'probable diagnosis' threshold (BNP (>400) or NT-proBNP (age<50 > 450; age 50-75 >900; age>75 >1800)) (18). We compared each of these case definitions in BC CPCSSN data against the HF cases identified by the gold standard chart review. Case definitions were plotted by their sensitivity and PPV.

### Insert Table 1 here

#### *Statistical Analysis*

Sensitivity, specificity, PPV, and NPV were calculated. The data were organized into 2x2 tables comparing each case definition (case/no case) with the chart review diagnosis (case/no case). 95% confidence intervals were constructed for each validity parameter using the Clopper-Pearson approach for proportions. Measures above 80% were considered acceptable for epidemiological research(15). All data were analyzed in SAS version 9.4 (SAS Institute Inc., Cary, NC).

#### *Sensitivity Analysis*

A sensitivity test was performed due to an unanticipated consequence of the timing of chart reviews (September-November 2019) and dates of data available for developing and testing the HF definition (up until December 31, 2018). We hypothesized that some of the cases

1  
2  
3 categorized as false negatives may have been incident in 2019, and so the algorithms would be  
4 unable to detect a HF diagnosis using data to end-2018. As a sensitivity test we were able to  
5 examine BC CPCSSN data to June 30, 2019 (2019-Q2) for a subset of the false negatives, to  
6 determine if they would meet the HF definition criteria with the addition of more up-to-date  
7 information.  
8  
9  
10  
11  
12

### 13 *Ethics Approval*

14  
15  
16 The scope of this project fell under CPCSSN ongoing quality improvement to improve the  
17 operationalization of the primary care network. Each clinician gave consent to access and use  
18 EMR data. BC-CPCSSN received ethics approval from UBC Research Ethics Board and this project  
19 is part of its ongoing quality improvement initiatives.  
20  
21  
22  
23

## 24 **Results**

### 25 **Case Validation Results**

26  
27 Among 649 patients with COPD from the 3 primary care practices in BC, 311 (47.9%; 113  
28 (36.3%) male and 198 (63.7%) female) were randomly selected for full chart abstraction.  
29 Seventy two (23.2%) were identified in file review as having HF. The mean (SD) age of cases was  
30 83.6 (10.9) and non-cases was 70.0 (12.8) years. Thirty (41.7%) cases were male and 42 (58.3%)  
31 were female (Table 2).  
32  
33  
34  
35  
36  
37  
38  
39

### 40 **Insert Table 2 here**

41  
42  
43 Table 3 and Appendix 5 details accuracy parameters and counts for all tested case definitions in  
44 BC-CPCSSN, respectively. Overall there was high sensitivity (range 75%-93%; this excludes  
45 definition 2.4), specificity (range 87%-99.6%) and NPV (range 80.1%-98.1%). PPV had a greater  
46 variability, ranging from 68.4% to 92.9%. Addition of billing data (Definition 1.1 to 1.2)  
47 improved the sensitivity and NPV, but diminished the specificity and PPV. Modification of  
48 diagnoses codes and drugs included from Appendix 3 to Appendix 4, resulted in a mild decrease  
49 in performance (Definition 1.1 vs. 2.5), with a small reduction in specificity, sensitivity, PPV and  
50  
51  
52  
53  
54  
55  
56  
57  
58  
59  
60

1  
2  
3 NPV. Further adjustment in Definition 3.2 built upon Definition 2.5 with the inclusion of  
4 furosemide and billings data, which resulted in comparable performance to Definition 1.1, with  
5 a much poorer PPV. Our preferred case definition with the optimal accuracy parameters was  
6 definition 1.1.  
7  
8  
9

### 10 11 12 **Insert Table 3 here** 13 14 15

16 Definition 4 and 5 included BNP and pro-BNP lab data in the various definitions. Of the 311  
17 patients, 20.9% (n=65) of patients had BNP or pro-BNP data, of which 50.8% were cases and  
18 49.2% were non-cases from chart review. Including either low and high thresholds for BNP did  
19 not significantly alter or improve the accuracy of the case definition.  
20  
21  
22

23  
24  
25 Definition 2.4 had excellent PPV but extremely low sensitivity. Most case-definitions had high  
26 sensitivity with varying PPV (Figure 2). Definition 1.1 and 5.1 represented case definitions with  
27 an excellent combination of sensitivity (90.3%, 91.7%) and PPV (80.2%, 79.5%).  
28  
29  
30

### 31 32 **Insert Figure 2 here** 33 34 35

36 For the sensitivity test, data from January 1, 2019 – June 30, 2019 was examined for 10 patients  
37 who were false negatives for one or more of the case definitions. These 10 patients accounted  
38 for 94/110 (85%) of all the false negatives across all case definitions excluding Definition 2.4.  
39 With the additional data, two of these patients met the criteria for case definitions that they  
40 did not otherwise meet using data to December 31, 2018. This marginally increased the  
41 sensitivity, PPV and NPV marginally for all of the case definitions except Definitions 2.3 and 2.4  
42 (Appendix 6).  
43  
44  
45  
46  
47  
48  
49  
50

### 51 **Interpretation** 52

53 Overall, the case definitions each performed well in the BC-CPCSSN database. There are  
54 several different options with excellent PPV as well as specificity that could be used to meet  
55  
56  
57  
58  
59  
60



1  
2  
3 surveillance objectives by various stakeholders. The majority of the case definitions met our  
4 criteria for acceptable validity parameters. However, definition 1.1 is our recommended case  
5 definition for HF within the CPCSSN database. Definition 5.1 performed well, but the  
6 abstraction of and reliance on a BNP may vary between provincial networks. BNPs may also not  
7 be collected from all patients with HF within the jurisdiction, creating a biased sample.  
8 Moreover, definition 1.1 is simpler and more consistent with other CPCSSN case definitions.  
9 Lastly, the change in parameters was minimal when adding natriuretic peptides.  
10  
11  
12  
13  
14  
15

16 Our findings are comparable to other studies looking at HF case definitions in EMR  
17 database/networks. In a US primary care EMR database, reported sensitivities for a HF case  
18 definition ranged from 41.3-78.7% and PPV from 68.5%- 86.5%(12). In comparison, our case  
19 definitions performed slightly better. In Ontario, the Electronic Medical Record Administrative  
20 data Linked Database (EMRALD) was utilized to validate HF case definitions. The optimal case  
21 definition included 1 hospital visit or physician billing visit and second physician billing visit  
22 within one year. This yielded a sensitivity 84.8%, specificity 97%, and PPV 55.7%. Our preferred  
23 case definition improves in terms of sensitivity and PPV, yet is slightly lower, but acceptable in  
24 terms of specificity. This highlights the utility of medication codes in CPCSSN compared to  
25 EMRALD(10). Lastly, the accuracy parameters of our HF definition are similar to other validated  
26 case definitions in CPCSSN(14).  
27  
28  
29  
30  
31  
32  
33  
34  
35

36 There are several implications for future research. Our case definition provides a  
37 relatively accurate sample of patients with COPD and HF in the BC-CPCSSN. Subsequent  
38 analyses will provide insights into the contemporary management of these patients in primary  
39 care, and explore HF classification in terms of reduced versus preserved ejection fraction. This  
40 case definition will permit epidemiological estimates (i.e. prevalence) of HF in COPD across  
41 Canada. Our findings will support screening and treatment of cardiovascular risk and disease in  
42 patients with COPD in primary care. Lastly, this work will instigate the development of a  
43 Primary Care Clinician Advisory Group to guide further projects within BC-CPCSSN. This will  
44 enable a collaborative integrated knowledge translation strategy and help inform design of  
45 future epidemiological and intervention studies, as well as quality improvement initiatives.  
46  
47  
48  
49  
50  
51  
52  
53  
54  
55  
56  
57  
58  
59  
60

1  
2  
3  
4  
5  
6  
7  
8  
9  
10  
11  
12  
13  
14  
15  
16  
17  
18  
19  
20  
21  
22  
23  
24  
25  
26  
27  
28  
29  
30  
31  
32  
33  
34  
35  
36  
37  
38  
39  
40  
41  
42  
43  
44  
45  
46  
47  
48  
49  
50  
51  
52  
53  
54  
55  
56  
57  
58  
59  
60

There are several strengths to our study. First, we used an excellent gold standard reference in the form of chart review by two medical professionals utilizing a standardized chart abstraction form that minimized misclassification and instrument bias. Second, a variety of case definitions were tested with very minimal alterations to the accuracy parameters, providing evidence that a simple definition is most robust to accurately identify HF in COPD patients. Third, our case definitions utilized a variety of parameters beyond billing codes to include medication codes and lab data.

However, this work is not without limitations. The chart validation occurred in one province where clinicians may record data more similarly than those in another province. The case definition may perform differently in other provinces, given the heterogeneity of the primary care clinicians and EMR systems. Chart data abstraction was done across different EMR systems and there are differences in how EMRs record data (i.e. ICD9 codes recorded in the health condition and encounter tables vs. billing table). These data capture COPD patients from 3 clinics and may not be representative of all individuals with COPD and HF in BC. In addition, the 3 clinics (n=9 clinicians) may have different practices compared to other clinicians. Lastly, chart reviews were performed late 2019; data available for developing and testing the HF definition was to December 31, 2018. Thus, people with newly diagnosed HF in 2019 might be undetectable in the data available for algorithm development (i.e. the algorithms would not be able to see the relevant data from 2019). A sensitivity test was performed that found marginal improvement in validity parameters with the addition of a subset of 2019 data; however in future it would be preferential to have better correspondence between the dates of data available for analysis and the dates of the chart review.

## Conclusion

Our study provides valid case definitions for HF in the pan-Canadian CPCSSN database. Several different case definitions were constructed and tested with excellent performance in the BC-CPCSSN database. The findings of this study will support ongoing research activities, chronic disease surveillance, and quality improvement initiatives in primary care for HF amongst people with COPD across Canada.

**Data-Sharing Statement:**

The data used in this study are available through the BC-CPCSSN. A data access request would need to be completed, along with an application. University-based researchers are eligible to apply for access to these data.

**Funding Statement:** The project was funded through the UBC Division of Cardiology Academic Practice Plan.

**Contributory Statement:**

Authors contributed substantially to conception and design (SW, NH, MG), acquisition of data (AG, SP, RV), analysis (SP, RV) and interpretation of data (all authors). RV initially drafted the manuscript and all authors subsequently revised it critically for important intellectual content. All authors gave final approval of version to be published.

**Acknowledgements**

BC-CPCSSN would like to thank primary care clinicians Drs. Cameron Ross, Nardia Strydom, Ilona Hale for participation in the study. We would also like to acknowledge the MaRNet-FP team for the development of the initial HF case definition that was used in our study. We would also like to thank Dr. John Queenan, CPCSSN epidemiologist for his contributions to sample size calculation for the chart review.

## References

1. Vos T, Flaxman AD, Naghavi M, Lozano R, Michaud C, Ezzati M, et al. Years lived with disability (YLDs) for 1160 sequelae of 289 diseases and injuries 1990-2010: A systematic analysis for the Global Burden of Disease Study 2010. *Lancet*. 2012;
2. Cook C, Cole G, Asaria P, Jabbour R, Francis DP. The annual global economic burden of heart failure. *Int J Cardiol*. 2014;
3. Dahlström U. Frequent non-cardiac comorbidities in patients with chronic heart failure. *European Journal of Heart Failure*. 2005.
4. Koudstaal S, Pujades-Rodriguez M, Denaxas S, Gho JMIH, Shah AD, Yu N, et al. Prognostic burden of heart failure recorded in primary care, acute hospital admissions, or both: a population-based linked electronic health record cohort study in 2.1 million people. *Eur J Heart Fail*. 2017;
5. Khand AU, Shaw M, Gemmel I, Cleland JGF. Do discharge codes underestimate hospitalisation due to heart failure? Validation study of hospital discharge coding for heart failure. *Eur J Heart Fail*. 2005;7(5):792–7.
6. Schellenbaum GD, Heckbert SR, Smith NL, Rea TD, Lumley T, Kitzman DW, et al. Congestive heart failure incidence and prognosis: Case identification using central adjudication versus hospital discharge diagnoses. *Ann Epidemiol*. 2006;16(2):115–22.
7. Ingelsson E, Ärnlöv J, Sundström J, Lind L. The validity of a diagnosis of heart failure in a hospital discharge register. *Eur J Heart Fail*. 2005;7(5):787–91.
8. Saczynski JS, Andrade SE, Harrold LR, Tjia J, Cutrona SL, Dodd KS, et al. A systematic review of validated methods for identifying heart failure using administrative data. *Pharmacoepidemiol Drug Saf*. 2012;
9. Quach S, Blais C, Quan H. Administrative data have high variation in validity for recording heart failure. *Can J Cardiol*. 2010;
10. Lee DS, Johansen H, Gong Y, Hall RE, Tu J V., Cox JL. Regional outcomes of heart failure in Canada. *Can J Cardiol*. 2004;
11. Schultz SE, Rothwell DM, Chen Z, Tu K. Identifying cases of congestive heart failure from administrative data: A validation study using primary care patient records. *Chronic Dis Inj Can*. 2013;
12. Patel YR, Robbins JM, Kurgansky KE, Imran T, Orkaby AR, McLean RR, et al. Development and validation of a heart failure with preserved ejection fraction cohort using electronic medical records. *BMC Cardiovasc Disord*. 2018;
13. Tison GH, Chamberlain AM, Pletcher MJ, Dunlay SM, Weston SA, Killian JM, et al. Identifying heart failure using EMR-based algorithms. *Int J Med Inform*. 2018;
14. Hawkins NM, Petrie MC, Jhund PS, Chalmers GW, Dunn FG, McMurray JJV. Heart failure and chronic obstructive pulmonary disease: Diagnostic pitfalls and epidemiology. *European Journal of Heart Failure*. 2009.
15. Williamson T, Green ME, Birtwhistle R, Khan S, Garies S, Wong ST, et al. Validating the 8 CPCSSN case definitions for chronic disease surveillance in a primary care database of electronic health records. *Ann Fam Med*. 2014;
16. Birtwhistle R, Keshavjee K, Lambert-Lanning A, Godwin M, Greiver M, Manca D, et al. Building a pan-Canadian primary care sentinel surveillance network: Initial development

- 1  
2  
3 and moving forward. Journal of the American Board of Family Medicine. 2009.  
4 17. Williamson T, Miyagishima RC, Derochie JD, Drummond N. Manual review of electronic  
5 medical records as a reference standard for case definition development: a validation  
6 study. C Open. 2017;  
7  
8 18. Ezekowitz JA, O'Meara E, McDonald MA, Abrams H, Chan M, Ducharme A, et al. 2017  
9 Comprehensive Update of the Canadian Cardiovascular Society Guidelines for the  
10 Management of Heart Failure. Can J Cardiol. 2017;  
11  
12 19. Ponikowski P, Voors AA, Anker SD, Bueno H, Cleland JGF, Coats AJS, et al. 2016 ESC  
13 Guidelines for the diagnosis and treatment of acute and chronic heart failure. European  
14 Heart Journal. 2016.  
15  
16  
17  
18  
19  
20  
21  
22  
23  
24  
25  
26  
27  
28  
29  
30  
31  
32  
33  
34  
35  
36  
37  
38  
39  
40  
41  
42  
43  
44  
45  
46  
47  
48  
49  
50  
51  
52  
53  
54  
55  
56  
57  
58  
59  
60

Confidential

Table 1. Case Definitions of Heart Failure used in BC CPCSSN

| Definition                                                        | Classify as have Heart Failure if the following conditions are met:                                                                                                                                                                                                                                                                                                                                                                                                                                                                                                                                                                                                                                                                                                                                    |
|-------------------------------------------------------------------|--------------------------------------------------------------------------------------------------------------------------------------------------------------------------------------------------------------------------------------------------------------------------------------------------------------------------------------------------------------------------------------------------------------------------------------------------------------------------------------------------------------------------------------------------------------------------------------------------------------------------------------------------------------------------------------------------------------------------------------------------------------------------------------------------------|
| 1.1.<br>Nova Scotia MAR-net<br>definition)                        | <ul style="list-style-type: none"> <li>• <math>\geq 1</math> ICD9 diagnostic codes in <b>Health Condition</b> table or <b>Encounter Diagnosis (Appendix 1) OR</b></li> <li>• Combination of ATC Codes in Medication table (Appendix 1): (ACE Inhibitor or ARB) and Beta blocker and Diuretic</li> </ul>                                                                                                                                                                                                                                                                                                                                                                                                                                                                                                |
| 1.2<br>Identical to 1.1 but<br>also searching billings            | <ul style="list-style-type: none"> <li>• <math>\geq 1</math> ICD9 diagnostic codes in <b>Health Condition</b> table or <b>Encounter Diagnosis or Billings (Appendix 1) OR</b></li> <li>• Combination of ATC codes in Medication table (Appendix 1): (ACE Inhibitor or ARBs) and Beta blocker and Diuretic</li> </ul>                                                                                                                                                                                                                                                                                                                                                                                                                                                                                   |
| 2.1<br>ICD-9 AND ATC codes<br>Also revised ICD-9<br>and ATC codes | <ul style="list-style-type: none"> <li>• <math>\geq 1</math> ICD-9 codes in Health Condition or Encounter Diagnosis or Billings (Appendix 2) <b>AND</b></li> <li>• <math>\geq 1</math> ATC code for <i>any</i> ACE Inhibitor or <i>any</i> ARB or Beta blocker or MRA or Hydralazine (Appendix 2 Medication table)</li> </ul>                                                                                                                                                                                                                                                                                                                                                                                                                                                                          |
| Definition 2.2<br>Subset of 2.1,<br>diagnoses only                | <ul style="list-style-type: none"> <li>• <math>\geq 1</math> ICD-9 codes in Health Condition or Encounter Diagnosis or Billings (Appendix 2)</li> </ul>                                                                                                                                                                                                                                                                                                                                                                                                                                                                                                                                                                                                                                                |
| Definition 2.3<br>Require two codes<br>separated in time          | <ul style="list-style-type: none"> <li>• <math>\geq 2</math> ICD-9 codes (Appendix 2) in Health Condition, Encounter Diagnosis and Billings combined, separated <math>\geq 30</math> days</li> </ul>                                                                                                                                                                                                                                                                                                                                                                                                                                                                                                                                                                                                   |
| Definition 2.4<br>Specific HF therapies                           | <ul style="list-style-type: none"> <li>• <math>\geq 1</math> ATC code for Sacubitril-valsartan <b>OR</b></li> <li>• Combination of ATC codes for (ACE Inhibitor or ARB) and Beta blocker and MRA (Appendix 2 Medication table)</li> </ul>                                                                                                                                                                                                                                                                                                                                                                                                                                                                                                                                                              |
| Definition 2.5                                                    | Definition 2.1 OR Definition 2.3 OR Definition 2.4                                                                                                                                                                                                                                                                                                                                                                                                                                                                                                                                                                                                                                                                                                                                                     |
| Definition 3.1                                                    | <p>Definition 2.1 with furosemide and without Billing file, as follows:</p> <ul style="list-style-type: none"> <li>○ <math>\geq 1</math> ICD-9 Codes in Health Condition or Encounter Diagnosis (Appendix 2)</li> </ul> <p><b>AND</b></p> <ul style="list-style-type: none"> <li>○ <math>\geq 1</math> ATC code for any ACE Inhibitor or any ARB or Beta blocker or MRA or Hydralazine <b>or furosemide</b>; as listed in Appendix 2 Medication table</li> <li>○</li> </ul> <p><b>OR</b></p> <ul style="list-style-type: none"> <li>• Definition 2.3 without Billing file: <math>\geq 2</math> ICD-9 Codes( Appendix 2) in Health Condition or Encounter Diagnosis, separated <math>\geq 30</math> days</li> </ul> <p><b>OR</b></p> <ul style="list-style-type: none"> <li>• Definition 2.4</li> </ul> |
| Definition 3.2                                                    | <ul style="list-style-type: none"> <li>• Definition 2.1 with furosemide, as follows: <ul style="list-style-type: none"> <li>○ <math>\geq 1</math> ICD-9 Codes in Health Condition or Encounter Diagnosis <b>or Billings</b></li> </ul> </li> </ul> <p><b>AND</b></p>                                                                                                                                                                                                                                                                                                                                                                                                                                                                                                                                   |

|                                      |                                                                                                                                                                                                                                                                                                                                                                                  |
|--------------------------------------|----------------------------------------------------------------------------------------------------------------------------------------------------------------------------------------------------------------------------------------------------------------------------------------------------------------------------------------------------------------------------------|
|                                      | <ul style="list-style-type: none"> <li>○ <math>\geq 1</math> ATC code for any ACE Inhibitor or any ARB or Beta blocker or MRA or Hydralazine <b>or furosemide</b>; as listed in Appendix 2 Medication table</li> </ul> <p>OR</p> <ul style="list-style-type: none"> <li>● Definition 2.3</li> </ul> <p>OR</p> <ul style="list-style-type: none"> <li>● Definition 2.4</li> </ul> |
| Definition 4.1<br>Low threshold BNP  | <ul style="list-style-type: none"> <li>● Definition 1.1</li> </ul> <p>OR</p> <ul style="list-style-type: none"> <li>● BNP &gt; 50 or NT-proBNP &gt; 125</li> </ul>                                                                                                                                                                                                               |
| Definition 4.2                       | <ul style="list-style-type: none"> <li>● Definition 1.2</li> </ul> <p>OR</p> <ul style="list-style-type: none"> <li>● BNP &gt; 50 or NT-proBNP &gt; 125</li> </ul>                                                                                                                                                                                                               |
| Definition 4.3                       | <ul style="list-style-type: none"> <li>● Definition 3.2</li> </ul> <p>OR</p> <ul style="list-style-type: none"> <li>● BNP &gt; 50 or NT-proBNP &gt; 125</li> </ul>                                                                                                                                                                                                               |
| Definition 5.1<br>High threshold BNP | <ul style="list-style-type: none"> <li>● Definition 1.1</li> </ul> <p>OR</p> <ul style="list-style-type: none"> <li>● BNP (&gt;400) or NT-proBNP(age&lt;50 &gt; 450; age 50-75 &gt;900; age&gt;75 &gt;1800)</li> </ul>                                                                                                                                                           |
| Definition 5.2                       | <ul style="list-style-type: none"> <li>● Definition 1.2</li> </ul> <p>OR</p> <ul style="list-style-type: none"> <li>● BNP (&gt;400) or NT-proBNP(age&lt;50 &gt; 450; age 50-75 &gt;900; age&gt;75 &gt;1800)</li> </ul>                                                                                                                                                           |
| Definition 5.3                       | <ul style="list-style-type: none"> <li>● Definition 3.2</li> </ul> <p>OR</p> <ul style="list-style-type: none"> <li>● BNP (&gt;400) or NT-proBNP(age&lt;50 &gt; 450; age 50-75 &gt;900; age&gt;75 &gt;1800)</li> </ul>                                                                                                                                                           |

Table 2. Participant Characteristics

|                                 | Overall     | Heart failure | No heart failure |
|---------------------------------|-------------|---------------|------------------|
| N (%)                           | 311         | 72 (23.2)     | 239 (76.8)       |
| Female, n (%)                   | 198 (63.7)  | 42 (58.3)     | 156 (65.3)       |
| Age, mean (sd)                  | 73.2 (13.6) | 83.6 (10.9)   | 70.0 (12.8)      |
| Age, n (%)                      |             |               |                  |
| 35- <50                         | 19 (6.1)    | 0 (0.0)       | 19 (7.9)         |
| 50 – 75                         | 162 (52.1)  | 17 (23.6)     | 145 (60.7)       |
| > 75                            | 130 (41.8)  | 55 (76.4)     | 75 (31.4)        |
| Clinic, n (%)                   |             |               |                  |
| A (Urban)                       | 130 (41.8)  | 40 (30.8)     | 90 (69.2)        |
| B (Rural)                       | 117 (37.6)  | 24 (20.5)     | 93 (79.5)        |
| C (Urban)                       | 64 (20.6)   | 8 (12.5)      | 56 (87.5)        |
| Other chronic conditions, n (%) |             |               |                  |
| Chronic Kidney Disease          | 28 (9.0)    | 12 (16.7)     | 16 (6.7)         |
| Dementia                        | 30 (9.6)    | 16 (22.2)     | 14 (5.9)         |
| Depression                      | 125 (40.2)  | 26 (36.1)     | 99 (41.4)        |
| Diabetes                        | 69 (22.2)   | 26 (36.1)     | 43 (18.0)        |
| Herpes Zoster                   | 32 (10.3)   | 6 (8.3)       | 26 (10.9)        |
| Hypertension                    | 178 (57.2)  | 52 (72.2)     | 126 (52.7)       |
| Osteoarthritis                  | 116 (37.3)  | 33 (45.8)     | 83 (34.7)        |
| No. of comorbid conditions*     |             |               |                  |
| 1                               | 45 (14.5)   | 7 (9.7)       | 38 (15.9)        |
| 2                               | 84 (27.0)   | 11 (15.3)     | 73 (30.5)        |
| 3                               | 94 (30.2)   | 20 (27.8)     | 74 (31.0)        |
| 4+                              | 88 (28.3)   | 34 (47.2)     | 54 (22.6)        |

n: total count; sd: standard deviation; No.: number

\* all have COPD so starts at 1; Limited to other conditions for which the Canadian Primary Care Sentinel Surveillance Network has validated algorithms: Chronic Kidney Disease, Dementia, Depression, Diabetes, Herpes Zoster, Hypertension, Osteoarthritis, Epilepsy, Parkinson. Epilepsy and Parkinson were not included because n<5 for both conditions.



Table 3. Accuracy Parameters of Case Definitions in BC CPCSSN

| Definition                                                                                         | Sensitivity<br>(95% CI) | Specificity<br>(95% CI) | PPV<br>(95% CI)   | NPV<br>(95% CI)   |
|----------------------------------------------------------------------------------------------------|-------------------------|-------------------------|-------------------|-------------------|
| 1.1 MaRNet-FP<br>1 ICD9 code OR<br>ACEI/ARB+BB+diuretic                                            | 90.3 (81.0, 96.0)       | 93.3 (89.4, 96.1)       | 80.2 (69.9, 88.3) | 97.0 (93.8, 98.8) |
| 1.2 MaRNet-FP<br>Including billings                                                                | 93.1 (84.5, 97.7)       | 90.8 (86.4, 94.1)       | 75.3 (65.0, 83.8) | 97.7 (94.8, 99.3) |
| <b>Expanding codes and testing iterations and specific combinations (British Columbia group 1)</b> |                         |                         |                   |                   |
| 2.1 One expanded code<br>AND specific medication                                                   | 75.0 (63.4, 84.5)       | 92.9 (88.9, 95.8)       | 76.1 (64.5, 85.4) | 92.5 (88.4, 95.5) |
| 2.2 One expanded code<br>only                                                                      | 91.7 (82.7, 96.9)       | 91.2 (86.9, 94.5)       | 75.9 (65.5, 84.4) | 97.3 (94.4, 99.0) |
| 2.3 Two expanded codes                                                                             | 83.3 (72.7, 91.1)       | 94.6 (90.9, 97.1)       | 82.2 (71.5, 90.2) | 95.0 (91.4, 97.4) |
| 2.4 Specific medication<br>only                                                                    | 18.1 (10.0, 91.1)       | 99.6 (97.7, 100.0)      | 92.9 (66.1, 99.8) | 80.1 (75.1, 84.5) |
| 2.5 (2.1 or 2.3 or 2.4)                                                                            | 87.5 (77.6, 94.1)       | 92.1 (87.9, 95.1)       | 76.8 (66.2, 85.4) | 96.1 (92.7, 98.2) |
| <b>Addition of furosemide (British Columbia group 2)</b>                                           |                         |                         |                   |                   |
| 3.1 (2.1 OR Furosemide)                                                                            | 80.6 (69.5, 88.9)       | 94.1 (90.4, 96.8)       | 80.6 (69.5, 88.9) | 94.1 (90.4, 96.8) |
| 3.2 (3.1 including billing)                                                                        | 90.3 (81.0, 96.0)       | 91.6 (87.4, 94.8)       | 76.5 (66.0, 85.0) | 96.9 (93.7, 98.7) |
| <b>Including low threshold natriuretic peptide (Low NP)</b>                                        |                         |                         |                   |                   |
| 4.1 (1.1 or low NP)                                                                                | 93.1 (84.5, 97.7)       | 88.7 (84.0, 92.4)       | 71.3 (61.0, 80.1) | 97.7 (94.7, 99.2) |
| 4.2 (1.2 or low NP)                                                                                | 94.4 (86.4, 98.5)       | 87.0 (82.1, 91.0)       | 68.7 (58.6, 77.6) | 98.1 (95.2, 99.5) |
| 4.3 (3.2 or low NP)                                                                                | 93.1 (84.5, 97.7)       | 87.0 (82.1, 91.0)       | 68.4 (58.2, 77.4) | 97.7 (94.6, 99.2) |
| <b>Including high threshold NP (High NP)</b>                                                       |                         |                         |                   |                   |
| 5.1 (1.1 or high NP)                                                                               | 91.7 (82.7, 96.9)       | 92.9 (88.9, 95.8)       | 79.5 (69.2, 87.6) | 97.4 (94.4, 99.0) |
| 5.2 (1.2 or high NP)                                                                               | 93.1 (84.5, 97.7)       | 90.8 (86.4, 94.1)       | 75.3 (65.0, 83.8) | 97.7 (94.8, 99.3) |
| 5.3 (3.2 or high NP)                                                                               | 90.3 (81.0, 96.0)       | 91.6 (87.4, 94.8)       | 76.5 (66.0, 85.0) | 96.9 (93.7, 98.7) |

PPV: Positive Predictive Value; NPV: Negative Predictive Value; 95% CI: 95% Confidence Interval; NS: Nova Scotia Definition; NP: natriuretic peptide; exp: expanded ICD-9 codes (see Appendix 3); Rx: medications (see Appendix 3)

1  
2  
3  
4  
5  
6  
7  
8  
9  
10  
11  
12  
13  
14  
15  
16  
17  
18  
19  
20  
21  
22  
23  
24  
25  
26  
27  
28  
29  
30  
31  
32  
33  
34  
35  
36  
37  
38  
39  
40  
41

**Figure 1 .** Flow diagram showing process of sample selection of patient charts from electronic medical record (EMR) in BC-CPCSSN database.

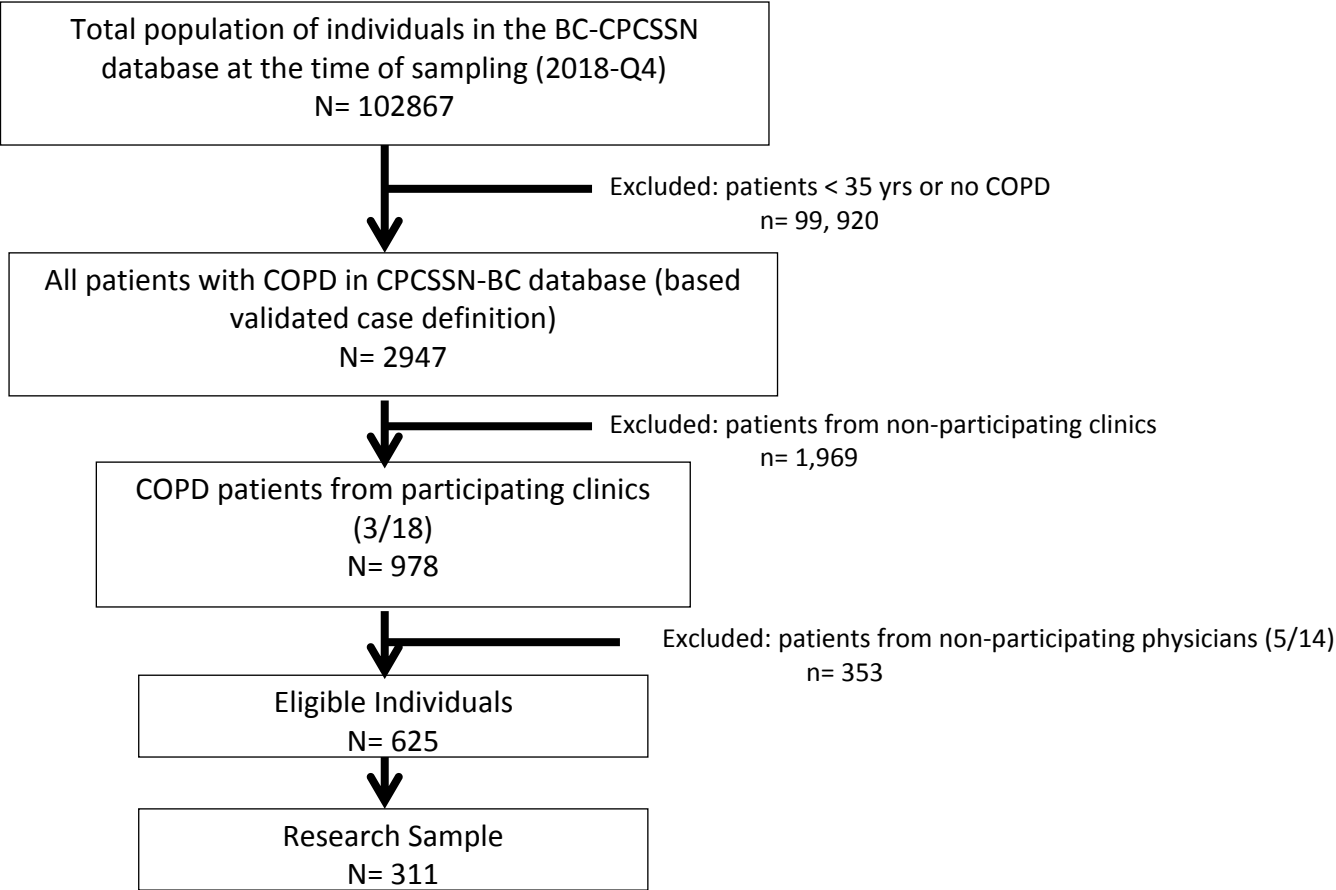

# Figure 1

**BC-CPCSSN: British Columbia Canadian Surveillance Sentinel Network; COPD: Chronic Obstructive Pulmonary Disorder; 2018-Q4: December 31, 2018;**

\*Anonymized data from these patient charts were reviewed. Case definitions for heart failure was then applied to this cohort of COPD patients for validation analysis

1  
2  
3  
4  
5  
6  
7  
8  
9  
10  
11  
12  
13  
14  
15  
16  
17  
18  
19  
20  
21  
22  
23  
24  
25  
26  
27  
28  
29  
30  
31  
32  
33  
34  
35  
36  
37  
38  
39  
40  
41

### Figure 2A

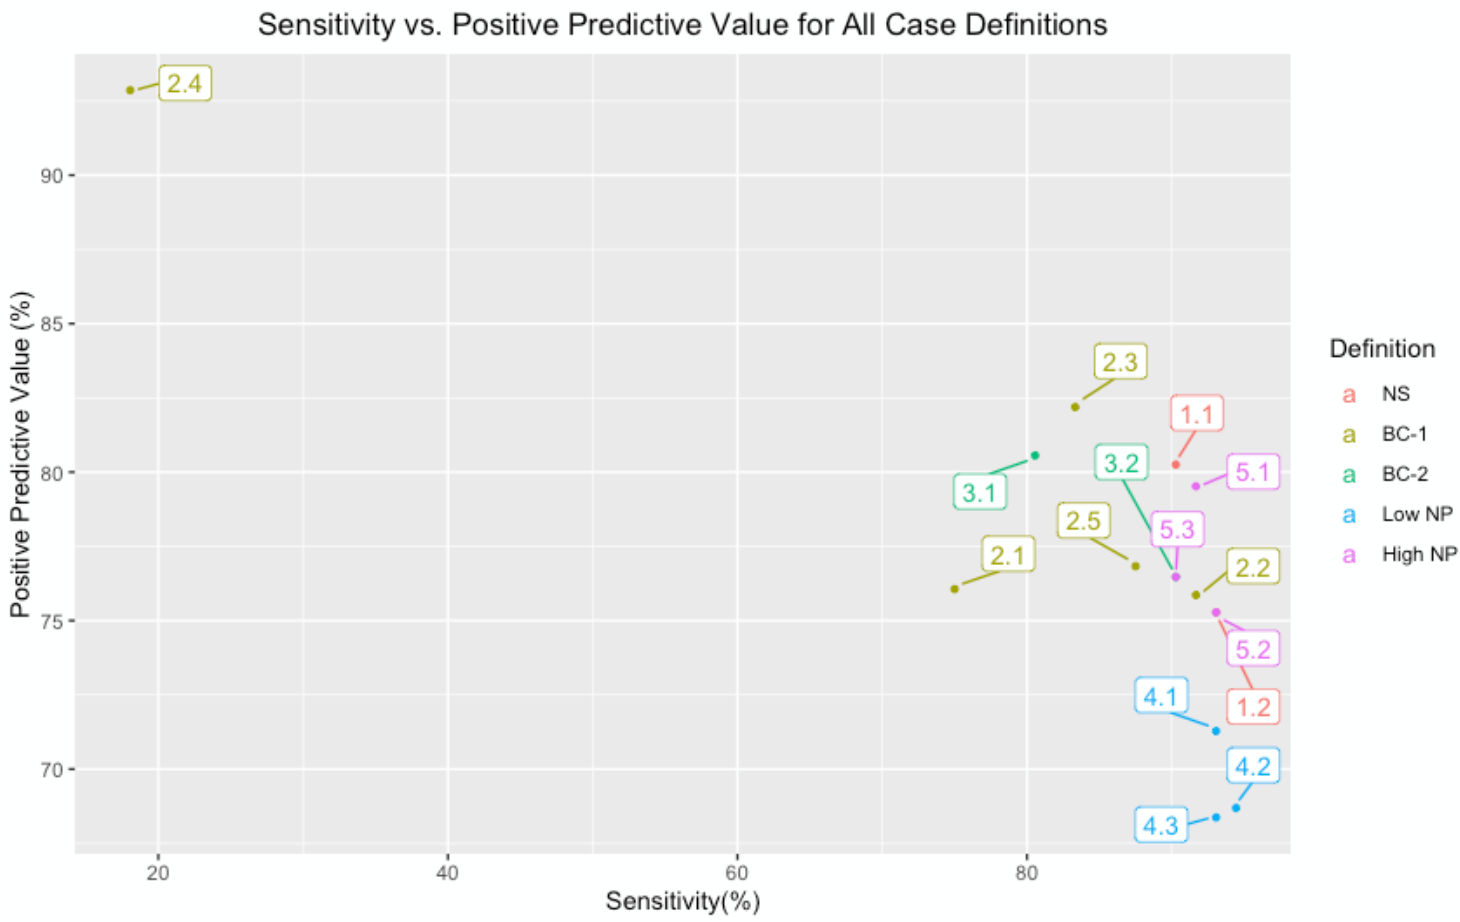

Figure 2B

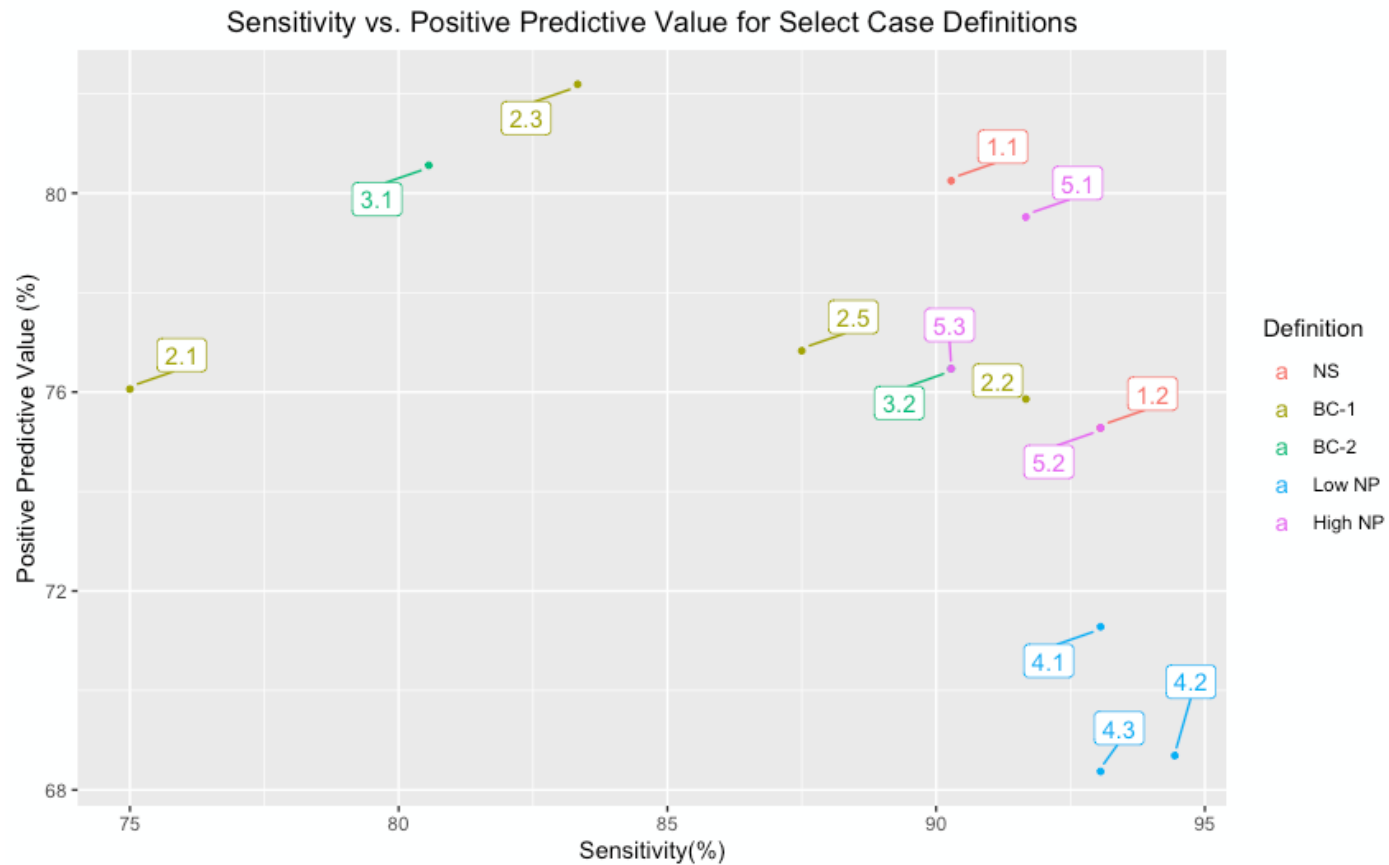

## Figure 2

Figure 2A depicts all case definitions in Table 2; Figure 2B. depicts all case definitions except Definition 2.4 for better visualizations of remaining case definitions

*Definitions correspond to categories in Table 2; NS: Original Nova Scotia MaRNet definition; BC-1: Expanding codes and testing iterations and specific combinations; BC-2: Addition of Furosemide; Low NP: Including low threshold natriuretic peptide; High NP: Including high threshold natriuretic peptide*

Appendices

Appendix 1. CPCSSN Architecture and Flow

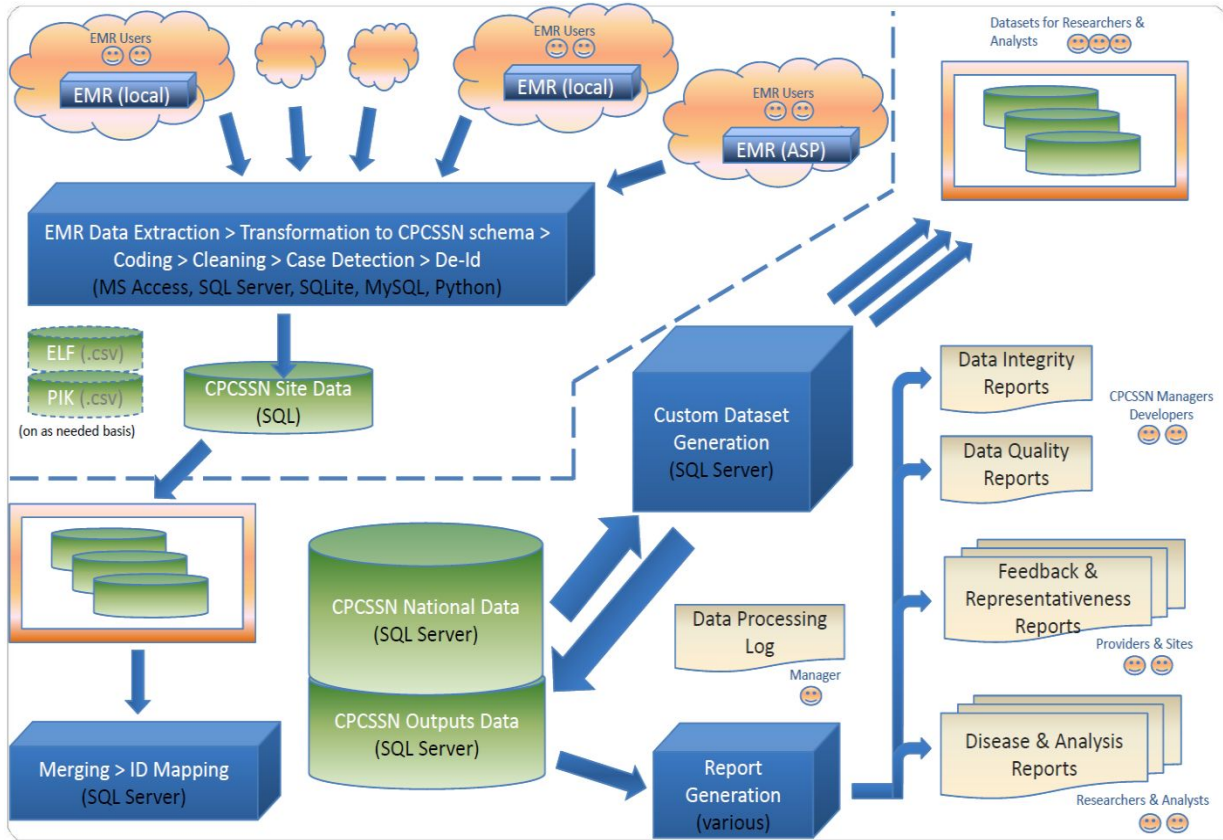

Appendix 2. Chart abstraction template used for the manual data extraction of heart failure among those with a diagnosis of chronic obstructive pulmonary disease

|                                                                              |                                                                                                                                             |
|------------------------------------------------------------------------------|---------------------------------------------------------------------------------------------------------------------------------------------|
| Elements collected                                                           |                                                                                                                                             |
| Physician diagnosis in EMR of Heart Failure (HF)                             | Yes/No/Uncertain                                                                                                                            |
| Physician speciality reporting HF diagnosis in EMR                           | Family physician, cardiologist, other                                                                                                       |
| Signs and symptoms                                                           | Dyspnea/Orthopnea/PND<br>Peripheral Edema<br>Elevated JVP<br>Respiratory findings                                                           |
| BNP > 50                                                                     | Yes/No and Value                                                                                                                            |
| NT-pro BNP >125                                                              | Yes/No and Value                                                                                                                            |
| ECHO                                                                         | Moderate/Severe LV systolic dysfunction<br>Moderate/Severe LV diastolic dysfunction<br>Severe valve abnormality<br>LVEF % (lowest reported) |
| MUGA                                                                         | LVEF                                                                                                                                        |
| Cardiac MRI                                                                  | LVEF                                                                                                                                        |
| Medication Hx                                                                | ACEi/ARB, Beta-blocker, aldosterone antagonist, Ivabradine, Diuretic (loop or thiazide), Hydralazine, Nitrate, Sacubitril-valsartan         |
| Implantable Cardiac Defibrillator or Hx of Cardiac Resynchronization therapy | Yes/No                                                                                                                                      |



## Appendix 3. Diagnosis codes table

| ICD-9 Code |                                                                |
|------------|----------------------------------------------------------------|
| 428        | Heart failure                                                  |
| 428        | Congestive heart failure, unspecified                          |
| 428.1      | Left heart failure convert                                     |
| 428.2      | Systolic heart failure                                         |
| 428.2      | Systolic heart failure, unspecified                            |
| 428.21     | Acute systolic heart failure                                   |
| 428.22     | Chronic systolic heart failure                                 |
| 428.23     | Acute on chronic systolic heart failure                        |
| 428.3      | Diastolic heart failure                                        |
| 428.3      | Diastolic heart failure, unspecified                           |
| 428.31     | Acute diastolic heart failure                                  |
| 428.32     | Chronic diastolic heart failure                                |
| 428.33     | Acute on chronic diastolic heart failure                       |
| 428.4      | Combined systolic and diastolic heart failure                  |
| 428.4      | Combined systolic and diastolic heart failure, unspecified     |
| 428.41     | Acute combined systolic and diastolic heart failure            |
| 428.42     | Chronic combined systolic and diastolic heart failure          |
| 428.43     | Acute on chronic combined systolic and diastolic heart failure |
| 428.9      | Heart failure, unspecified                                     |
| 425        | Cardiomyopathy                                                 |
| 425.0      | Endomyocardial fibrosis                                        |
| 425.1      | Hypertrophic cardiomyopathy                                    |
| 425.11     | Hypertrophic obstructive                                       |
| 425.18     | Other hypertrophic cardiomyopathy                              |
| 425.2      | Obscure cardiomyopathy                                         |
| 425.3      | Endocardial fibroelastosis                                     |
| 425.4      | Other primary cardiomyopathies                                 |
| 425.5      | Alcoholic cardiomyopathy                                       |
| 425.7      | Nutritional and metabolic cardiomyopathy                       |
| 425.8      | Cardiomyopathy in other diseases classified elsewhere          |
| 425.9      | Secondary cardiomyopathy, unspecified                          |

## Medication table (ATC codes)

1  
2  
3  
4  
5  
6  
7  
8  
9  
10  
11  
12  
13  
14  
15  
16  
17  
18  
19  
20  
21  
22  
23  
24  
25  
26  
27  
28  
29  
30  
31  
32  
33  
34  
35  
36  
37  
38  
39  
40  
41  
42  
43  
44  
45  
46  
47  
48  
49  
50  
51  
52  
53  
54  
55  
56  
57  
58  
59  
60

| <b>ACE inhibitors</b>                       |                          |
|---------------------------------------------|--------------------------|
| C09AA01                                     | Captopril                |
| C09AA02                                     | Enalapril                |
| C09AA03                                     | Lisinopril               |
| C09AA04                                     | Perindopril              |
| C09AA05                                     | Ramipril                 |
| C09AA06                                     | Quinapril                |
| C09AA07                                     | Benazepril               |
| C09AA09                                     | Cilazapril               |
| C09AA10                                     | Trandolapril             |
| <b>Angiotensin receptor blockers (ARBs)</b> |                          |
| C09CA01                                     | Losartan                 |
| C09CA02                                     | Eprosartan               |
| C09CA03                                     | Valsartan                |
| C09CA04                                     | Irbesartan               |
| C09CA06                                     | Candesartan              |
| C09CA07                                     | Telmisartan              |
| C09CA08                                     | Olmesartan medoxomil     |
| C09DX04                                     | Valsartan and sacubitril |
| <b>Beta blockers</b>                        |                          |
| C07AB02                                     | Metoprolol               |
| C07AB03                                     | Atenolol                 |
| C07AB04                                     | Acebutolol               |
| C07AB07                                     | Bisoprolol               |
| C07AB12                                     | Nebivolol                |
| C07AG02                                     | Carvedilol               |
| <b>Diuretic</b>                             |                          |
| C03DA01                                     | Spirololactone           |
| C03DA04                                     | Eplerenone               |
| C03CA01                                     | Furosemide               |
| C03BA11                                     | Indapamide               |

## Appendix 4. Diagnosis codes table

|                                       |                                                                           |
|---------------------------------------|---------------------------------------------------------------------------|
| ICD-9 Codes                           |                                                                           |
| 428; any or no decimals is acceptable | Heart failure                                                             |
| 425 (no decimals)                     | Cardiomyopathy                                                            |
| 425.4                                 | Other primary cardiomyopathies                                            |
| 425.5                                 | Alcoholic cardiomyopathy                                                  |
| 425.7                                 | Nutritional and metabolic cardiomyopathy                                  |
| 425.8                                 | Cardiomyopathy in other diseases classified elsewhere                     |
| 425.9                                 | Secondary cardiomyopathy, unspecified                                     |
| 402.x1*                               | Hypertensive heart disease with cardiovascular disease with heart failure |
| 404.x1, 404.x3*                       | Hypertensive heart disease with cardiorenal with heart failure            |

\* x indicates any number in that position.

\*\*Changes from Appendix 1 included removing 425.0-425.3 (425.0 Endomyocardial fibrosis, 425.1 Hypertrophic cardiomyopathy, 425.2 Obscure cardiomyopathy and 425.3 Endocardial fibroelastosis) and addition of 402.X1, 404.X1 and 404.X3

## Medication table (ATC codes)

|                               |                      |
|-------------------------------|----------------------|
| <b>ACE inhibitors / ARBs</b>  |                      |
| C09A-C09D                     |                      |
| <b>Beta blockers</b>          |                      |
| C07AB02                       | Metoprolol           |
| C07AB03                       | Atenolol             |
| C07AB04                       | Acebutolol           |
| C07AB07                       | Bisoprolol           |
| C07AB12                       | Nebivolol            |
| C07AG02                       | Carvedilol           |
| <b>MRA</b>                    |                      |
| C03DA01                       | Spirolactone         |
| C03DA04                       | Eplerenone           |
| <b>Hydralazine</b>            |                      |
| C02DB02                       | Hydralazine          |
| <b>Sacubitril-valsartan</b>   |                      |
| C09DX04                       | Sacubitril-valsartan |
| <b>Loop/Thiazide Diuretic</b> |                      |
| C03CA01                       | Furosemide           |

## Appendix 5. 2x2 tables for Case Definitions in BC CPCSSN vs Gold Standard (Chart Review)

|                |         | Gold Standard (Chart Review) |         |
|----------------|---------|------------------------------|---------|
|                |         | COPD                         | No COPD |
| Definition 1.1 | COPD    | 65                           | 16      |
|                | No COPD | 7                            | 223     |
| Definition 1.2 | COPD    | 67                           | 22      |
|                | No COPD | 5                            | 217     |
| Definition 2.1 | COPD    | 54                           | 17      |
|                | No COPD | 18                           | 222     |
| Definition 2.2 | COPD    | 66                           | 21      |
|                | No COPD | 6                            | 218     |
| Definition 2.3 | COPD    | 60                           | 13      |
|                | No COPD | 12                           | 226     |
| Definition 2.4 | COPD    | 13                           | 1       |
|                | No COPD | 59                           | 238     |
| Definition 2.5 | COPD    | 63                           | 19      |
|                | No COPD | 9                            | 220     |
| Definition 3.1 | COPD    | 58                           | 14      |
|                | No COPD | 14                           | 225     |
| Definition 3.2 | COPD    | 65                           | 20      |
|                | No COPD | 7                            | 219     |
| Definition 4.1 | COPD    | 67                           | 27      |
|                | No COPD | 5                            | 212     |
| Definition 4.2 | COPD    | 68                           | 31      |
|                | No COPD | 4                            | 208     |
| Definition 4.3 | COPD    | 67                           | 31      |
|                | No COPD | 5                            | 208     |
| Definition 5.1 | COPD    | 66                           | 17      |
|                | No COPD | 6                            | 222     |
| Definition 5.2 | COPD    | 67                           | 22      |
|                | No COPD | 5                            | 217     |
| Definition 5.3 | COPD    | 65                           | 20      |
|                | No COPD | 7                            | 219     |

## Appendix 6. Accuracy Parameters from Sensitivity Test of Case Definitions in BC CPCSSN

| Definition                                                                                         | Sensitivity<br>(95% CI) | Specificity<br>(95% CI) | PPV<br>(95% CI)   | NPV<br>(95% CI)   |
|----------------------------------------------------------------------------------------------------|-------------------------|-------------------------|-------------------|-------------------|
| 1.1 MaRNet-FP<br>1 ICD9 code OR<br>ACEI/ARB+BB+diuretic                                            | 93.1 (84.5, 97.7)       | 93.3 (89.4, 96.1)       | 80.7 (70.6, 88.6) | 97.8 (95.0, 99.3) |
| 1.2 MaRNet-FP<br>Including billings                                                                | 94.4 (86.4, 98.5)       | 90.8 (86.4, 94.1)       | 75.6 (65.4, 84.0) | 98.2 (95.4, 99.5) |
| <b>Expanding codes and testing iterations and specific combinations (British Columbia group 1)</b> |                         |                         |                   |                   |
| 2.1 One expanded code<br>AND specific medication                                                   | 76.4 (64.9, 85.6)       | 92.9 (88.9, 95.8)       | 76.4 (64.9, 85.6) | 92.9 (88.9, 95.8) |
| 2.2 One expanded code<br>only                                                                      | 93.1 (84.5, 97.7)       | 91.2 (86.9, 94.5)       | 76.1 (65.9, 84.6) | 97.8 (94.8, 99.3) |
| 2.3 Two expanded codes                                                                             | 83.3 (72.7, 91.1)       | 94.6 (90.9, 97.1)       | 82.2 (71.5, 90.2) | 95.0 (91.4, 97.4) |
| 2.4 Specific medication<br>only                                                                    | 18.1 (10.0, 28.9)       | 99.6 (97.7, 100.0)      | 92.9 (66.1, 99.8) | 80.1 (75.1, 84.5) |
| 2.5 (2.1 or 2.3 or 2.4)                                                                            | 88.9 (79.3, 95.1)       | 92.1 (87.9, 95.1)       | 77.1 (66.6, 85.6) | 96.5 (93.2, 98.5) |
| <b>Furosemide (British Columbia group 2)</b>                                                       |                         |                         |                   |                   |
| 3.1 (2.1 OR Furosemide)                                                                            | 83.3 (72.7, 91.1)       | 94.1 (90.4, 96.8)       | 81.1 (70.3, 89.3) | 94.9 (91.3, 97.4) |
| 3.2 (3.1 including billing)                                                                        | 91.7 (82.7, 96.9)       | 91.6 (87.4, 94.8)       | 76.7 (66.4, 85.2) | 97.3 (94.3, 99.0) |
| <b>Including low threshold natriuretic peptide</b>                                                 |                         |                         |                   |                   |
| 4.1 (1.1 or low NP)                                                                                | 94.4 (86.4, 98.5)       | 88.7 (84.0, 92.4)       | 71.6 (61.4, 80.4) | 98.1 (95.3, 99.5) |
| 4.2 (1.2 or low NP)                                                                                | 95.8 (88.3, 99.1)       | 87.0 (82.1, 91.0)       | 69.0 (59.0, 77.9) | 98.6 (95.9, 99.7) |
| 4.3 (3.2 or low NP)                                                                                | 94.4 (86.4, 98.5)       | 87.0 (82.1, 91.0)       | 68.7 (58.6, 77.6) | 98.1 (95.2, 99.5) |
| <b>Including high threshold NP (High NP)</b>                                                       |                         |                         |                   |                   |
| 5.1 (1.1 or high NP)                                                                               | 93.1 (84.5, 97.7)       | 92.9 (88.9, 95.8)       | 79.8 (69.6, 87.7) | 97.8 (94.9, 99.3) |
| 5.2 (1.2 or high NP)                                                                               | 94.4 (86.4, 98.5)       | 90.8 (86.4, 94.1)       | 75.6 (65.4, 84.0) | 98.2 (95.4, 99.5) |
| 5.3 (3.2 or high NP)                                                                               | 91.7 (82.7, 96.9)       | 91.6 (87.4, 94.8)       | 76.7 (66.4, 85.2) | 97.3 (94.3, 99.0) |

PPV: Positive Predictive Value; NPV: Negative Predictive Value; 95% CI: 95% Confidence Interval; NS: Nova Scotia Definition; NP: natriuretic peptide; exp: expanded ICD-9 codes (see Appendix 3); Rx: medications (see Appendix 3)
