# Supplementary figures and images for: Identifying heart failure in patients with chronic obstructive lung disease through the Canadian Primary Care Sentinel Surveillance Network in British Columbia: a case derivation study
Source: PubMed Central journal article supplement — CMAJ Open. 2021 Apr 16;9(2):E376–83. doi: 10.9778/cmajo.20200183 (PMC8084551; doi:10.9778/cmajo.20200183), 2021-04-16

## Appendix 1. CPCSSN Architecture and Flow

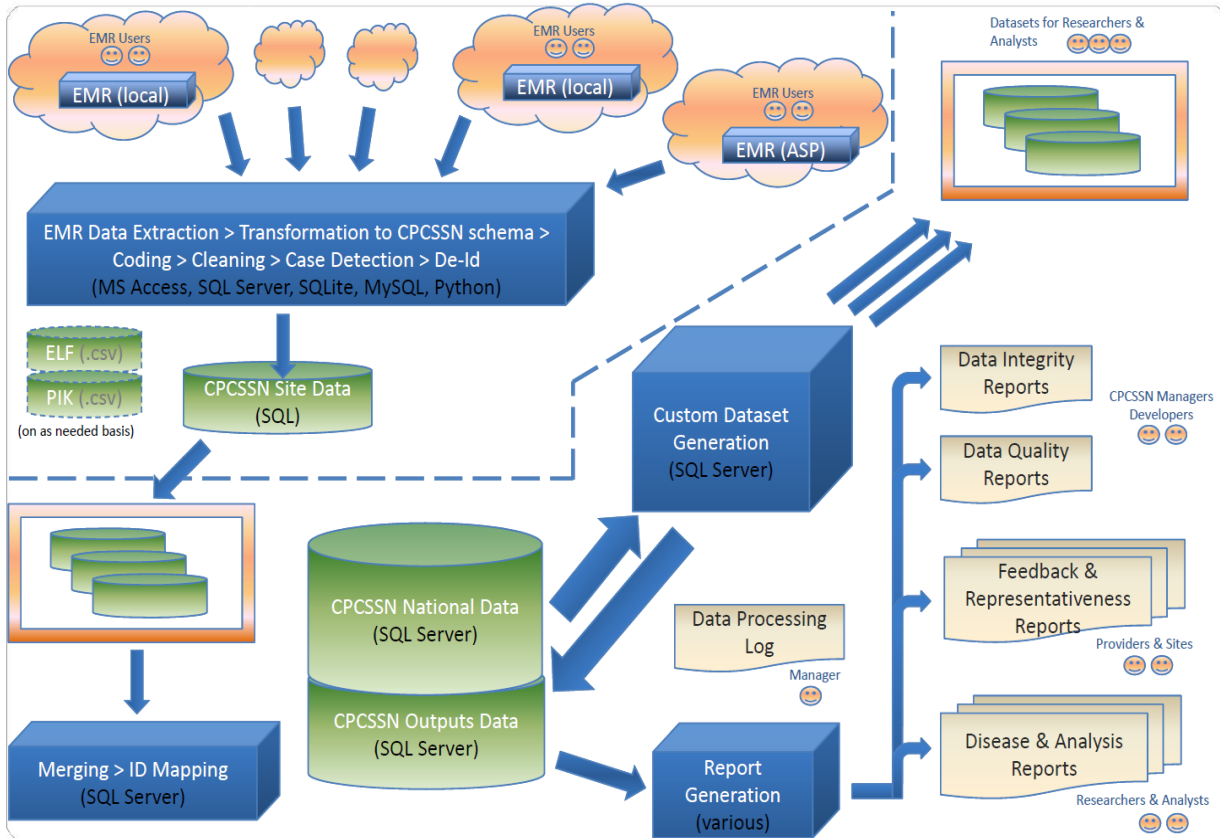

Supplement: supp_9.2.E376_2020-0183-1-at.pdf [file supp_9.2.E376_2020-0183-1-at.pdf]
